# Supplementary material for: Predictability of Radiologically Measured Psoas Muscle Area for Intraoperative Hypotension in Older Adult Patients Undergoing Femur Fracture Surgery
Source: MDPI journal article supplement (doi:10.3390/jcm12041691), 2023-02-20
Supplement: s1 [file s1]

**Table S1.** Factors of modified frailty index

---

|                                                                                               |
|-----------------------------------------------------------------------------------------------|
| History of diabetes mellitus <sup>a</sup>                                                     |
| History of congestive heart failure                                                           |
| History of hypertension requiring medication                                                  |
| History of either transient ischemic attack or cerebrovascular accident                       |
| Non-independent functional status (partially or totally dependent activities of daily living) |
| History of myocardial infarction within 6 months                                              |
| History of either peripheral vascular disease or rest pain                                    |
| History of a cerebrovascular accident with neurological deficit                               |
| History of either COPD exacerbation or pneumonia within 30 days                               |
| History of either prior PCI, PCS at any time, or angina within 30 days                        |
| History of impaired sensorium                                                                 |

---

COPD, chronic obstructive pulmonary disease; PCI, percutaneous coronary intervention; PCS, prior cardiac

surgery. <sup>a</sup> diabetes controlled by diet alone, treated with oral anti-hyperglycemic therapy or with insulin.
